# Supplementary material for: Klebsiella pneumoniae causes bacteremia using factors that mediate tissue-specific fitness and resistance to oxidative stress
Source: PLoS Pathog. 2023 Jul 18;19(7):e1011233. doi: 10.1371/journal.ppat.1011233 (PMC10381055; doi:10.1371/journal.ppat.1011233)
Supplement: S2 Table — Genes in which transposon mutations resulted in higher recovery after bacteremia. (XLSX) [file ppat.1011233.s012.xlsx]

## Sheet: Sup. Table 2. Increased Fitness
ID	Gene_name	Mean.Input	Mean.Output	FC	log2FC(Output/Input)	padj
VK055_0016	cytosine-specific methyltransferase	1589.25	11715	4.91747	2.29792	0.000749738
VK055_0038	dihydrodipicolinate synthase	556.013	2455.73	5.87187	2.55382	0.0307234
VK055_0197	hypothetical protein	2747.8	7629.23	2.01038	1.00747	0.0135719
VK055_0248	patatin-like phospholipase family protein	1806.46	9843.73	4.13606	2.04826	0.0105107
VK055_0249	regulator of RpoS	1697.12	16838.6	5.11761	2.35547	1.18645e-05
VK055_0265	cardiolipin synthase	2556.05	68248.3	6.29409	2.654	0.000453112
VK055_0336	fecCD transport family protein	482.886	3257.6	3.84868	1.94436	0.039151
VK055_0344	4-hydroxy-2-oxovalerate aldolase	3152.62	7530.95	2.39703	1.26125	0.00184104
VK055_0387	hypothetical protein	1272.1	3200.64	2.2035	1.1398	0.0440921
VK055_0391	gluconate 2-dehydrogenase flavoprotein	1557.59	3512.01	2.05409	1.0385	0.0435767
VK055_0440	acrB/AcrD/AcrF family protein	3099.25	6488.29	1.99636	0.997369	0.00437488
VK055_0492	fusaric acid resistance family protein	1.48797	13.3674	9.16403	3.19598	0.039349
VK055_0551	bacterial Cytochrome Ubiquinol Oxidase family protein	453.433	6017.02	4.44386	2.15181	0.0151446
VK055_0605	bacterial regulatory, tetR family protein	1023.66	6292.01	4.30545	2.10616	0.00595089
VK055_0670	AFG1-like ATPase family protein	412.592	1632.81	4.01342	2.00483	0.0110732
VK055_0900	blue light-responsive regulator of YcgE	1103.41	1585.42	3.46157	1.79143	0.0135719
VK055_0982	transporter, basic amino acid/polyamine antiporter family protein	3030.07	79863	6.10811	2.61073	0.000203628
VK055_0988	fumarate hydratase, class II	1034.49	1765.77	2.35276	1.23436	0.0426417
VK055_1133	hypothetical protein	140.777	443.76	7.42328	2.89206	0.0264671
VK055_1136	periplasmic oligopeptide-binding protein	4088.78	8571.3	1.82659	0.869154	0.010071
VK055_1267	protein kinase	2176.83	3951.52	2.58852	1.37213	0.00828563
VK055_1388	ribosomal-protein-S5-alanine N-acetyltransferase	1188.98	2986.18	2.32591	1.2178	0.010071
VK055_1503	AAA domain protein	1199.59	11944.9	3.2836	1.71528	0.00217334
VK055_1591	ABC transporter family protein	14195.2	445573	10.6199	3.4087	2.17081e-06
VK055_1592	artI	12734.6	315781	6.68078	2.74002	0.0318059
VK055_1594	amino ABC transporter, permease, 3-TM region, His/Glu/Gln/Arg/opine family domain protein	17907.3	614392	10.8906	3.44501	8.51867e-06
VK055_2002	amino acid permease family protein	3164.5	17117.3	3.09022	1.62771	0.00166214
VK055_2104	acrR transcriptional regulator AcrR transcriptional repressor	1331.5	2662.79	2.65003	1.40601	0.012893
VK055_2110	maltose O-acetyltransferase	2726.3	27401.2	6.59082	2.72046	1.62506e-05
VK055_2146	queuosine biosynthesis protein QueC	1521.88	22156.8	5.52923	2.46708	0.00139168
VK055_2198	tRNA ribosyltransferase-isomerase	1607.96	45402.1	7.7506	2.95431	0.014228
VK055_2213	branched-chain amino acid transport system II carrier protein	5225.24	148516	9.87572	3.30389	1.18016e-09
VK055_2288	type VII secretion system (T7SS), usher family protein	781.513	1312.64	3.39444	1.76317	0.0499867
VK055_2292	bacterial regulatory, luxR family protein	3459.84	5636.55	1.83023	0.872023	0.0166393
VK055_2455	amino acid permease family protein	2799.04	14777.1	2.79889	1.48485	0.00166214
VK055_2508	inner membrane protein yabI	672.194	18966.9	6.09623	2.60792	0.0160163
VK055_2516	DEAD/DEAH box helicase family protein	5975.42	134011	6.04223	2.59508	5.80822e-11
VK055_2542	citrate-sodium symporter	1873.85	2045.33	2.68402	1.42439	0.00696675
VK055_2600	peptide chain release factor 3	4806.26	143728	8.05733	3.0103	4.42689e-07
VK055_2604	16S rRNA m2G1207 methyltransferase	2772.15	52530.9	5.30976	2.40865	0.0178649
VK055_2728	glycosyl transferases group 1 family protein	3735.2	122325	7.58956	2.92402	0.0234614
VK055_2739	eco57I restriction-modification methylase familyprotein	3224.34	8181.22	2.51455	1.3303	0.000285412
VK055_2885	ribonuclease R	2369.92	18893.4	3.89036	1.9599	1.18016e-09
VK055_2995	type VII secretion system (T7SS), usher family protein	6443.53	7792.34	1.79666	0.845319	0.00994268
VK055_3162	magnesium and cobalt transport protein CorA	14602.5	446393	5.98594	2.58158	1.06124e-07
VK055_3212	hdfR transcriptional regulator HdfR transcriptional repressor	1080.63	24025.8	8.84486	3.14484	0.00021525
VK055_3221	tonB-dependent vitamin B12 receptor	10636.5	28292.9	1.81974	0.863732	0.00322154
VK055_3244	met Apo-repressor, MetJ family protein	443.234	2831.84	5.04078	2.33365	0.001047
VK055_3276	helix-turn-helix family protein	1387.08	5834.44	4.63579	2.21282	0.00992982
VK055_3322	AAA domain family protein	2182.11	4298.12	2.51719	1.33181	0.00340457
VK055_3741	slyX family protein	1601.16	6290.82	3.48203	1.79993	0.0464182
VK055_3821	septum formation protein Maf	4665.09	139017	5.83351	2.54436	6.89567e-05
VK055_3822	ribonuclease G	3481.64	58479.2	4.1167	2.04149	0.00322154
VK055_3853	glutamate synthase (NADPH) large chain glutamatesynthase, large subunit	6060.84	39648	1.89917	0.925366	0.0045649
VK055_3856	zinc-binding dehydrogenase family protein	2482.7	4164.41	2.29826	1.20055	0.0426722
VK055_3904	tRNA pseudouridine(55) synthase	1407.75	9786.22	3.41718	1.77281	0.00166214
VK055_3907	polyribonucleotide nucleotidyltransferase	1626.02	74561.4	10.6631	3.41455	1.62506e-05
VK055_4100	ribosomal RNA small subunit methyltransferase E	546.976	3219.72	3.58981	1.84391	0.0204387
VK055_4144	glycine dehydrogenase	2909.01	4650.07	2.96787	1.56943	0.00828563
VK055_4309	aldehyde dehydrogenase family protein	1469.97	3141.2	2.64293	1.40214	0.00587402
VK055_4334	precorrin-3B C17-methyltransferase	423.471	2215.87	5.13691	2.3609	0.018818
VK055_4348	hypothetical protein	2197.41	22814.1	4.30237	2.10513	0.0030171
VK055_4377	queuine synthase	2459.14	27464.9	3.06237	1.61465	0.035745
VK055_4386	hybrid sensory histidine kinase, in two-component regulatory system with UvrY	5024.7	18974	2.40192	1.26419	8.37903e-05
VK055_4394	hypothetical protein	2453.51	29630.8	5.14846	2.36414	0.0151446
VK055_4427	tonB dependent receptor family protein	4166.11	50317.7	2.30421	1.20427	0.0106327
VK055_4504	emrR transcriptional repressor MprA transcriptional repressor	6437.33	252647	10.8783	3.44339	0.000257206
VK055_4505	ygaH L-valine exporter	2578.93	66013.8	10.4314	3.38285	0.000278227
VK055_4560	smpA	770.122	13228.9	3.96673	1.98795	0.014228
VK055_4682	cyclic di-GMP phosphodiesterase YfgF	2563.31	4827.52	1.94274	0.958096	0.0304515
VK055_4700	nlpB/DapX lipofamily protein	710.9	11936.3	5.48546	2.45561	0.0018672
VK055_4816	amino ABC transporter, permease, 3-TM region, His/Glu/Gln/Arg/opine family domain protein	619.538	1324.52	3.88171	1.95669	0.0151446
VK055_5021	putative serotype K2 polymerase	2.71071	24.2336	9.92372	3.31088	0.0178649
VK055_5125	major Facilitator Superfamily protein	1558.9	2833.49	2.51096	1.32824	0.0291393
